# Supplementary material for: WASH to control COVID-19: A rapid review
Source: PubMed Central journal article supplement (PMC9403322; doi:10.3389/fpubh.2022.976423), 2022-08-11
Supplement: Table_1.pdf [file Table_1.pdf]

## Supplementary Table 1: Search strategies

| S.No | Databases                 | Search Strategies                                                                                                                                                                                                                                                                                                                                                                                                                                                                                |
|------|---------------------------|--------------------------------------------------------------------------------------------------------------------------------------------------------------------------------------------------------------------------------------------------------------------------------------------------------------------------------------------------------------------------------------------------------------------------------------------------------------------------------------------------|
| 1.   | <b>MEDLINE via PubMed</b> | <p>((((((((((covid*[Title/Abstract]) OR (coronavirus*[Title/Abstract])) OR ("corona virus*[Title/Abstract]) OR (2019-nCoV[Title/Abstract])) OR (nCoV*[Title/Abstract])) OR (SARS*[Title/Abstract])) OR ("severe acute respiratory syndrome"[Title/Abstract])) OR (coronavirus, sars[MeSH Terms]))) AND ((((((WASH[Title/Abstract]) OR (wash*[Title/Abstract])) OR (hygiene[Title/Abstract])) OR (sanitation[Title/Abstract])) OR (sanitary[Title/Abstract]))))</p>                               |
| 2.   | <b>CENTRAL</b>            | <p>ID Search</p> <p>#1 coronavirus*</p> <p>#2 "corona virus"</p> <p>#3 nCoV*</p> <p>#4 2019nCoV</p> <p>#5 SARS-CoV-2</p> <p>#6 MeSH descriptor: [Coronavirus] explode all trees</p> <p>#7 COVID*</p> <p>#8 #1 OR #2 OR #3 OR #4 OR #5 OR #6 OR #7</p> <p>#9 WASH</p> <p>#10 sanitation</p> <p>#11 hygiene</p> <p>#12 MeSH descriptor: [Sanitation] explode all trees</p> <p>#13 MeSH descriptor: [Hygiene] explode all trees</p> <p>#14 #9 OR #10 OR #11 OR #12 OR #13</p> <p>#15 #8 AND #14</p> |
| 3.   | <b>EMBASE</b>             | <p>#16 #9 AND #15</p> <p>#15 OR #11 OR #12 OR #13 OR #14</p> <p>#14 sanitary:ti,ab</p> <p>#13 sanitation:ti,ab</p> <p>#12 hygiene:ti,ab</p> <p>#11 wash*:ti,ab</p> <p>#10 wash:ti,ab</p> <p>#9 #1 OR #2 OR #3 OR #4 OR #5 OR #6 OR #7 OR #8</p> <p>#8 'sars coronavirus'/exp</p> <p>#7 'severe acute respiratory syndrome':ti,ab</p> <p>#6 sars*:ti,ab</p> <p>#5 ncov*:ti,ab</p>                                                                                                                 |

|  |  |                                                                                              |
|--|--|----------------------------------------------------------------------------------------------|
|  |  | #4 '2019 ncov':ti,ab<br>#3 'corona virus*':ti,ab<br>#2 coronavirus*:ti,ab<br>#1 covid*:ti,ab |
|--|--|----------------------------------------------------------------------------------------------|
