# Supplementary material for: WASH to control COVID-19: A rapid review
Source: PubMed Central journal article supplement (PMC9403322; doi:10.3389/fpubh.2022.976423), 2022-08-11
Supplement: Table_2.pdf [file Table_2.pdf]

## Supplementary File 2: List of excluded studies

| SN | Excluded Study (ID)       | Reason for exclusion       |
|----|---------------------------|----------------------------|
| 1. | Zhou and Jiang (1)        | Article in Chinese         |
| 2. | Cochereau and Lamirel (2) | Article in French          |
| 3. | CDC (3)                   | Not on WASH                |
| 4. | Pinkas et al., (4)        | Not an observational study |
| 5. | File and Tsang (5)        | Not an observational study |
| 6. | <u>Onishchenko</u> (6)    | Article in French          |
| 7. | <u>Cooper</u> et al., (7) | Not on WASH                |
| 8. | <u>Wei et al.</u> (8)     | Not on WASH                |

### References

1. Zhou ZX, Jiang CQ. [Effect of environment and occupational hygiene factors of hospital infection on SARS outbreak]. *Zhonghua Lao Dong Wei Sheng Zhi Ye Bing Za Zhi*. 2004 Aug;22(4):261–3.
2. Cochereau I, Lamirel C. Hygiène des mains et masques contre COVID-19 : oser le dégradé ? *Journal Français d’Ophtalmologie*. 2020 May;43(5):386–8.
3. Centers for Disease Control and Prevention (CDC). Cluster of severe acute respiratory syndrome cases among protected health-care workers--Toronto, Canada, April 2003. *MMWR Morb Mortal Wkly Rep*. 2003 May 16;52(19):433–6.
4. Pinkas J, Jankowski M, Szumowski Ł, Lusawa A, Zgliczyński WS, Raciborski F, et al. Public Health Interventions to Mitigate Early Spread of SARS-CoV-2 in Poland. *Med Sci Monit* [Internet]. 2020 Apr 13 [cited 2022 Jul 18];26. Available from: <https://www.medscimonit.com/abstract/index/idArt/924730>
5. File T, Tsang K. Severe Acute Respiratory Syndrome. 2005;4(2):12.
6. Onishchenko GG. [On the epidemiological situation in quarantine, natural focal and other infections on the territory of the Southern Federal District]. *Zh Mikrobiol Epidemiol Immunobiol*. 2004 Jun;(3):23–30.

7. Cooper BS, Fang LQ, Zhou JP, Feng D, Lv H, Wei MT, et al. Transmission of SARS in three Chinese hospitals. *Tropical Medicine & International Health*. 2009 Nov;14:71–8.
8. Wei MT, de Vlas SJ, Yang Z, Borsboom GJJM, Wang L, Li H, et al. The SARS outbreak in a general hospital in Tianjin, China: clinical aspects and risk factors for disease outcome. *Tropical Medicine & International Health*. 2009 Nov;14:60–70.
